# Supplementary material for: Fire–precipitation interactions amplify the quasi-biennial variability in fires over southern Mexico and Central America
Source: Copernicus journal article supplement (doi:10.5194/acp-24-3115-2024), 2024-03-12
Supplement: Supplementary file 1 [file acp-24-3115-2024-supplement.pdf]

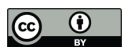

*Supplement of*

## **Fire–precipitation interactions amplify the quasi-biennial variability in fires over southern Mexico and Central America**

**Yawen Liu et al.**

*Correspondence to:* Yun Qian (yun.qian@pnnl.gov)

The copyright of individual parts of the supplement might differ from the article licence.

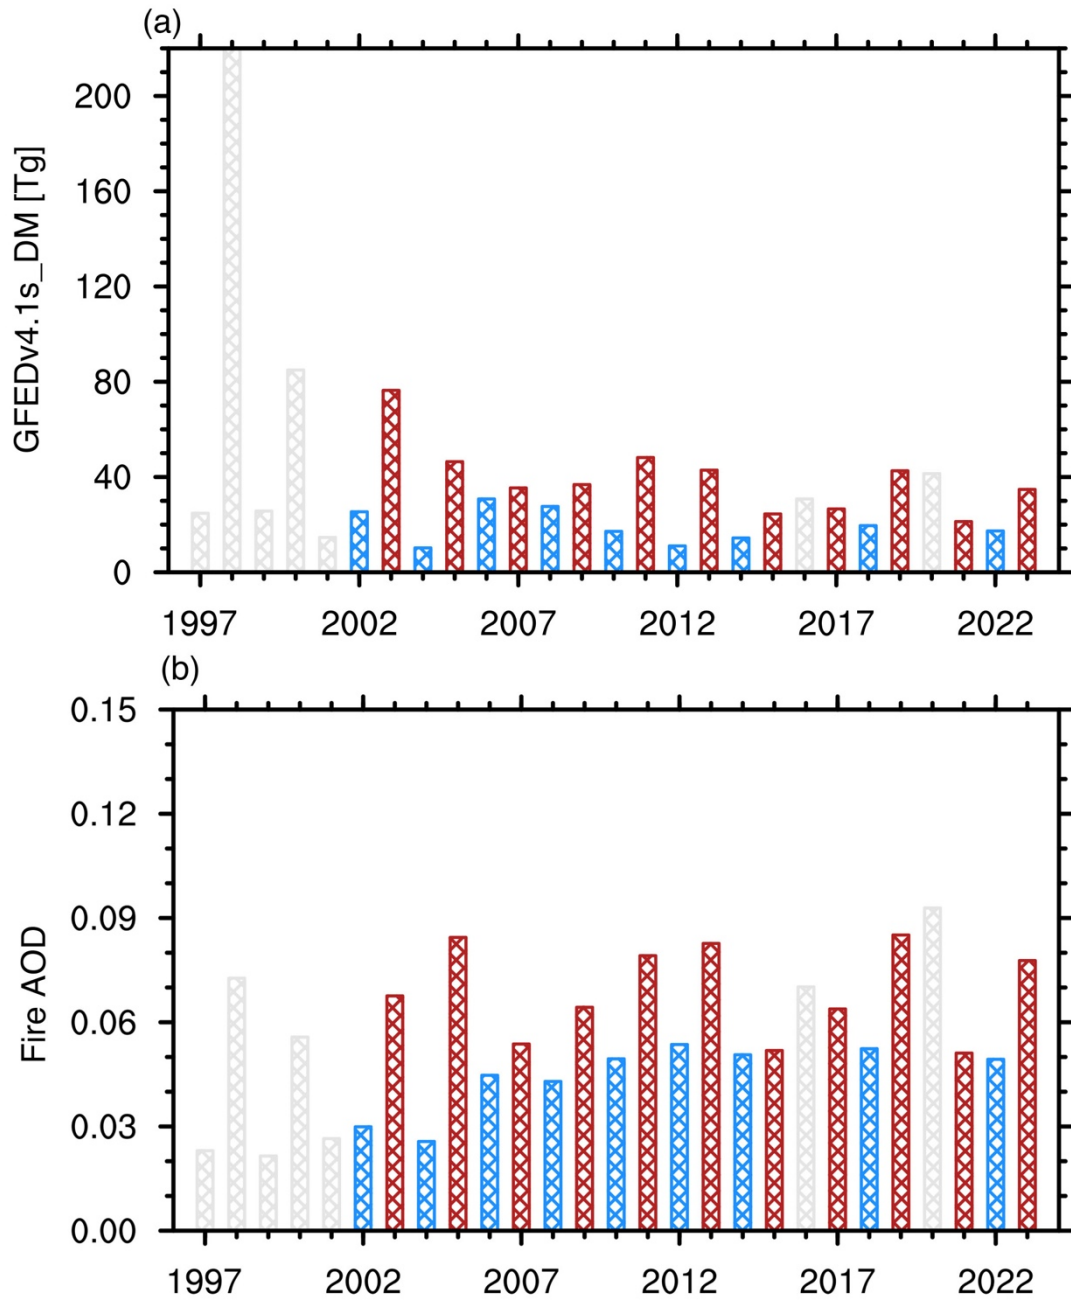

13

14 Figure S1. Interannual variations of different fire characteristics during the peak  
 15 burning season (Apr-May) over Southern Mexico and Central America (SMCA). (a)  
 16 The regional sum of the total dry matter consumed by fire activities based on the  
 17 GFEDv4.1s emission data over 1997-2023. (b) Regional mean aerosol optical depth  
 18 (AOD) of black carbon aerosols from MERRA-2 reanalysis over 1997-2023.

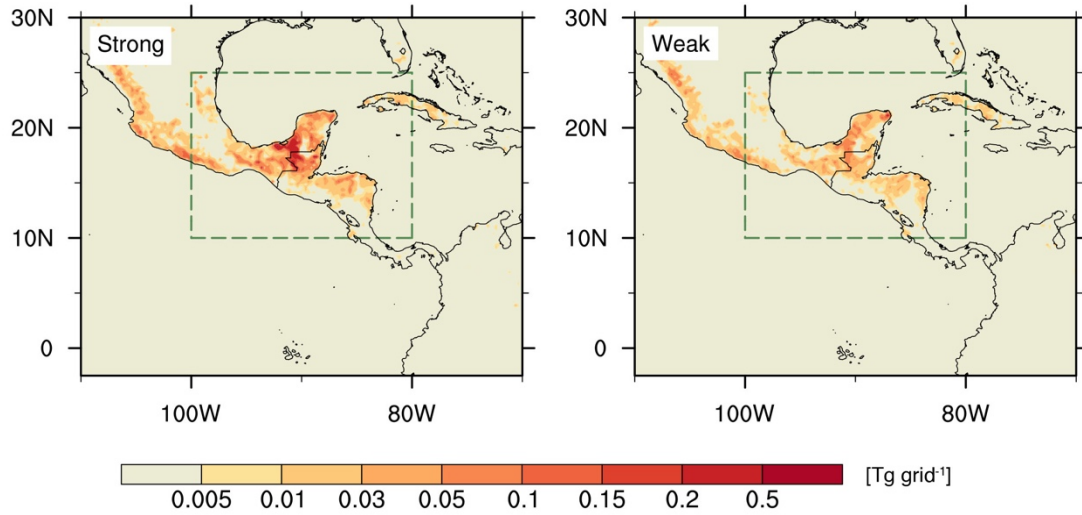

19

20 **Figure S2.** Comparison of fire activities during strong and weak fire years over SMCA.  
 21 Spatial distributions of fire-consumed total dry matter composited in strong and weak  
 22 years respectively.

23

24

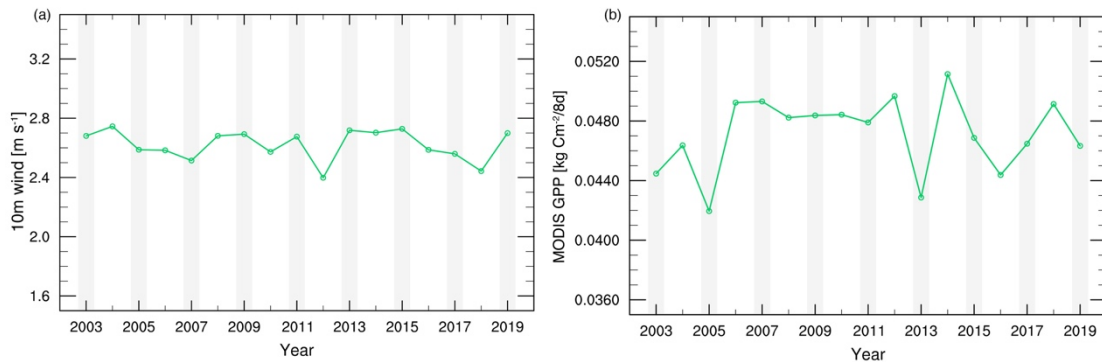

25

26 **Figure S3.** Temporal variations of the regional mean (a) 10m wind speed averaged over  
 27 SMCA in the peak burning season (Apr-May) and (b) gross primary productivity in the  
 28 month prior to fire season.

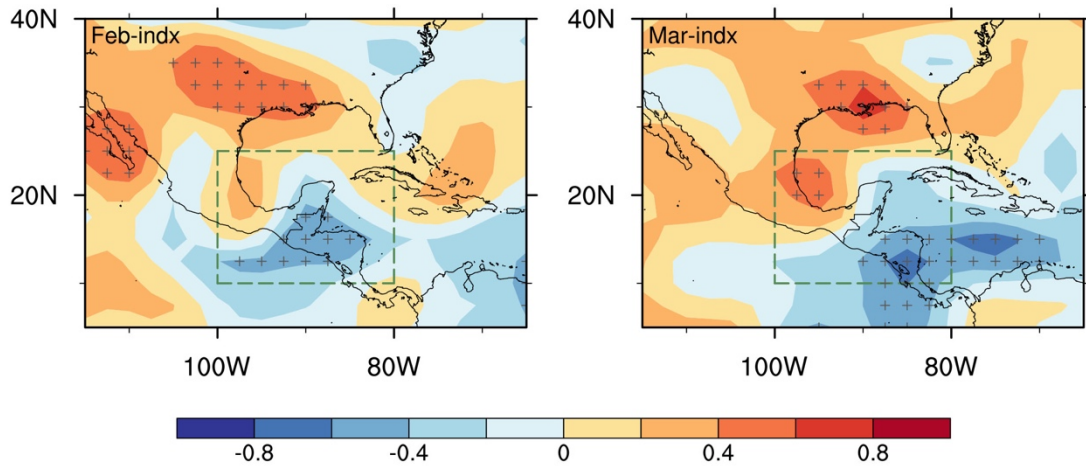

29

30 **Fig. S4** Spatial distributions of correlations of EP/NP index in February and March with  
 31 the mean vertical pressure velocity (reversed signs) in the peak fire months (Apr-May)  
 32 during 2003-2019. Stippling indicates the correlations are statistically significant based  
 33 on the student's T-test.

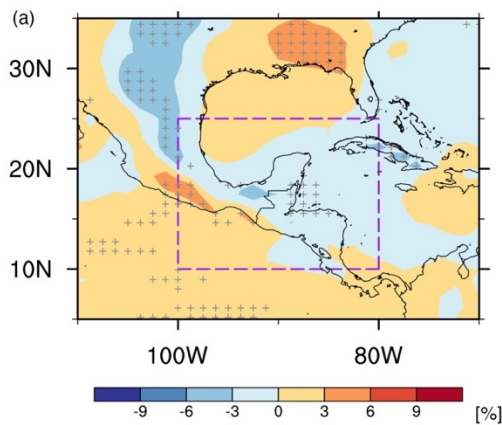

34

35 **Fig. S5** Changes in meteorological variables induced by fire-emitted aerosols.  
 36 Differences in near surface (2m) relative humidity between Case\_Strong and  
 37 Case\_Weak. Stippling indicates the differences are statistically significant at the 90%  
 38 confidence level based on T-test.
